# Supplementary material
Source: PubMed Central journal article supplement (PMC2117170)
Supplement: thorax_thx.2006.066241_3.pdf [file thorax_thx.2006.066241_3.pdf]

**EARLY GROWTH AND ADULT RESPIRATORY FUNCTION IN MEN AND WOMEN  
FOLLOWED FROM THE FOETAL PERIOD TO ADULTHOOD**

DEXTER CANOY,<sup>1-3</sup> JUHA PEKKANEN,<sup>4,5</sup> PAUL ELLIOTT,<sup>2</sup> ANNELI POUTA,<sup>6,7</sup> JAANA  
LAITINEN,<sup>8</sup> ANNA-LIISA HARTIKAINEN,<sup>7</sup> PAAVO ZITTING,<sup>1</sup> SWATEE PATEL,<sup>9</sup> MARK  
P. LITTLE<sup>2</sup> AND MARJO-RIITTA JÄRVELIN<sup>1,2</sup>

<sup>1</sup>Department of Public Health Science and General Practice, University of Oulu, Finland

<sup>2</sup>Department of Epidemiology and Public Health, Imperial College London, United Kingdom

<sup>3</sup>Northwest Institute for Bio-Health Informatics, University of Manchester, United Kingdom

<sup>4</sup>Environmental Epidemiology Unit, National Public Health Institute, Finland

<sup>5</sup>Department of Public Health and Clinical Nutrition, University of Kuopio, Finland

<sup>6</sup>Life Course Studies Unit, National Public Health Institute, Finland

<sup>7</sup>Department of Obstetrics and Gynecology, University of Oulu, Finland

<sup>8</sup>Oulu Regional Institute of Occupational Health, Finland

<sup>9</sup>School of Computing & Mathematical Sciences, The University of Greenwich, United Kingdom

Online Data Supplement

Table S1. Characteristics of men and women in the 1966 Northern Finland Birth Cohort study by quintile of birth weight.

| Variables                                   | Birth weight quintile (g) |              |              |              |              |
|---------------------------------------------|---------------------------|--------------|--------------|--------------|--------------|
|                                             | <3130                     | 3130 to 3400 | 3410 to 3640 | 3650 to 3920 | ≥3920        |
| <b>MEN</b> (Number)                         | 467                       | 501          | 491          | 565          | 660          |
| Birth weight, g                             | 2846 ±249                 | 3282 ±84     | 3527 ±63     | 3775 ±82     | 4246 ±284    |
| Weight gain during first year*, kg          | 7.2 ±1.1                  | 7.0 ±1.0     | 6.9 ±1.1     | 7.0 ±1.0     | 6.9 ±1.2     |
| Gestational age at birth, weeks             | 39.3 ±1.4                 | 40.1 ±1.4    | 40.2 ±1.4    | 40.6 ±1.5    | 40.8 ±1.3    |
| Height at 31 y, m                           | 1.76 ±0.06                | 1.77 ±0.06   | 1.78 ±0.06   | 1.79 ±0.06   | 1.81 ±0.06   |
| Weight, kg                                  | 77.2 (12.7)               | 78.7 (11.8)  | 79.8 (12.4)  | 81.0 (12.8)  | 83.2 (12.7)  |
| Body-mass index† at 31 y, kg/m <sup>2</sup> | 24.9 ±3.7                 | 25.1 ±3.5    | 25.3 ±3.6    | 25.3 ±3.8    | 25.5 ±3.5    |
| Forced expiratory volume in 1 s at 31 y, L  | 4.37 ±0.59                | 4.46 ±0.61   | 4.49 ±0.61   | 4.59 ±0.61   | 4.74 ±0.61   |
| Forced vital capacity at 31 y, L            | 5.27 ±0.72                | 5.38 ±0.74   | 5.42 ±0.75   | 5.53 ±0.72   | 5.73 ±0.74   |
| FEV <sub>1</sub> :FVC‡ at 31 y              | 0.831 ±0.061              | 0.833 ±0.072 | 0.832 ±0.065 | 0.832 ±0.060 | 0.829 ±0.061 |
| Predicted FEV <sub>1</sub> at 31 y, %       | 97.7 (11.4)               | 98.8 (11.9)  | 98.6 (11.5)  | 99.3 (11.7)  | 100.8 (11.2) |
| % Cigarette smoking at 31 y (n)             | 34.0 (159)                | 35.7 (179)   | 30.8 (151)   | 32.6 (184)   | 31.1 (205)   |
| % Low physical activity level§ at 31 y (n)  | 57.1 (267)                | 57.5 (288)   | 56.1 (275)   | 59.1 (334)   | 55.9 (369)   |
| % Known asthma¶ at 14 or 31 y (n)           | 7.3 (34)                  | 9.4 (47)     | 8.6 (42)     | 7.6 (43)     | 8.6 (57)     |
| % Known obstructive disease   at 31 y (n)   | 5.4 (25)                  | 7.0 (35)     | 4.3 (21)     | 5.8 (33)     | 4.5 (30)     |
| % Childhood respiratory infection** (n)     | 6.9 (32)                  | 6.4 (32)     | 7.1 (35)     | 6.4 (36)     | 7.0 (46)     |
| % Mothers smoking during pregnancy (n)      | 15.4 (72)                 | 13.6 (68)    | 14.7 (72)    | 11.9 (67)    | 10.6 (70)    |
| % Social class III and IV at birth†† (n)    | 47.5 (222)                | 45.5 (228)   | 44.4 (218)   | 40.5 (229)   | 42.4 (280)   |
| % Social class III and IV at 31 y‡‡ (n)     | 66.0 (308)                | 65.7 (329)   | 66.3 (326)   | 63.2 (357)   | 64.2 (424)   |

Data presented as mean ± standard deviation for all continuous variables; S denotes second, y denotes

years, FEV<sub>1</sub> denotes forced expiratory volume in one second and FVC denotes forced vital capacity;

\*Measured between the 10<sup>th</sup> to 14<sup>th</sup> month and data available only for 4557 participants; †Weight/height<sup>2</sup>;

‡Ratio of forced expiratory volume in one second to forced vital capacity; §Participation in brisk activity of

at least 20 minutes is less than twice a week; ¶Physician-diagnosis; ||Physician-diagnosed emphysema or

chronic bronchitis; \*\*Hospital diagnosis of acute respiratory infection or pneumonia at 0 to 7 years;

††Parental social class (III – unskilled/others, IV – farmers); ††Adult social class (III – vocational, IV – no education beyond elementary school/unknown).

Table S1. Characteristics of men and women in the 1966 Northern Finland Birth Cohort study by quintile of birth weight. (cont'd)

| Variables                                   | Birth weight quintile (g) |              |              |              |              |
|---------------------------------------------|---------------------------|--------------|--------------|--------------|--------------|
|                                             | <3130                     | 3130 to 3400 | 3410 to 3640 | 3650 to 3920 | ≥3920        |
| <b>WOMEN</b> (Number)                       | 615                       | 625          | 538          | 528          | 400          |
| Birth weight, g                             | 2857 ±253                 | 3275 ±84     | 3539 ±63     | 3778 ±84     | 4213 ±275    |
| Weight gain during first year*, kg          | 6.6 ±1.0                  | 6.6 ±1.1     | 6.6 ±1.1     | 6.5 ±1.1     | 6.3 ±1.1     |
| Gestational age at birth, weeks             | 39.7 ±1.6                 | 40.2 ±1.5    | 40.5 ±1.3    | 40.6 ±1.3    | 41.0 ±1.4    |
| Height at 31 y, m                           | 1.62 ±0.06                | 1.64 ±0.06   | 1.65 ±0.06   | 1.66 ±0.06   | 1.67 ±0.07   |
| Weight, kg                                  | 62.2 (11.8)               | 65.3 (13.7)  | 66.1 (12.9)  | 66.7 (13.5)  | 69.1 (15.0)  |
| Body-mass index† at 31 y, kg/m <sup>2</sup> | 23.6 ±4.2                 | 24.3 ±5.0    | 24.3 ±4.7    | 24.2 ±4.7    | 24.8 ±5.2    |
| Forced expiratory volume in 1 s at 31 y, L  | 3.27 ±0.46                | 3.37 ±0.43   | 3.41 ±0.45   | 3.46 ±0.46   | 3.56 ±0.50   |
| Forced vital capacity at 14 or 31 y, L      | 3.87 ±0.53                | 3.98 ±0.53   | 4.02 ±0.54   | 4.09 ±0.54   | 4.19 ±0.60   |
| FEV <sub>1</sub> :FVC‡ at 31 y              | 0.848 ±0.070              | 0.850 ±0.058 | 0.852 ±0.060 | 0.849 ±0.069 | 0.855 ±0.068 |
| Predicted FEV <sub>1</sub> at 31 y, %       | 98.2 (12.0)               | 99.6 (11.0)  | 99.7 (11.2)  | 100.0 (11.8) | 101.8 (12.3) |
| % Cigarette smoking at 31 y (n)             | 23.3 (143)                | 22.6 (141)   | 22.9 (118)   | 21.4 (113)   | 25.3 (101)   |
| % Low physical activity level§ at 31 y (n)  | 59.0 (363)                | 54.2 (339)   | 59.9 (322)   | 59.8 (316)   | 59.3 (237)   |
| % Known asthma¶ at 14 or 31 y (n)           | 9.9 (61)                  | 11.7 (73)    | 11.3 (61)    | 9.1 (48)     | 10.3 (41)    |
| % Known obstructive disease   at 31 y (n)   | 4.7 (29)                  | 7.7 (48)     | 5.8 (31)     | 4.9 (26)     | 6.5 (26)     |
| % Childhood respiratory infection** (n)     | 6.3 (39)                  | 4.6 (29)     | 4.5 (24)     | 4.4 (23)     | 5.0 (20)     |
| % Mothers smoking during pregnancy (n)      | 15.8 (97)                 | 13.6 (85)    | 11.0 (59)    | 10.2 (54)    | 7.3 (29)     |
| % Social class III and IV at birth†† (n)    | 50.4 (310)                | 44.0 (275)   | 40.9 (220)   | 44.3 (234)   | 47.0 (188)   |
| % Social class III and IV at 31 y‡‡ (n)     | 66.6 (311)                | 62.1 (311)   | 50.7 (249)   | 41.6 (235)   | 30.3 (200)   |

Data presented as mean ± standard deviation for all continuous variables; S denotes second, y denotes

years, FEV<sub>1</sub> denotes forced expiratory volume in one second and FVC denotes forced vital capacity;

\*Measured between the 10<sup>th</sup> to 14<sup>th</sup> month and data available only for 4557 participants; †Weight/height<sup>2</sup>;

‡Ratio of forced expiratory volume in one second to forced vital capacity; §Participation in brisk activity of

at least 20 minutes is less than twice a week; ¶Physician-diagnosis; ||Physician-diagnosed emphysema or

chronic bronchitis; \*\*Hospital diagnosis of acute respiratory infection or pneumonia at 0 to 7 years;

††Parental social class (III – unskilled/others, IV – farmers); ††Adult social class (III – vocational, IV – no education beyond elementary school/unknown).

Figure S1. Forced vital capacity (L) at age 31 years by tertiles of birth weight and weight gain during first year in men and women in the 1966 Northern Finland Birth Cohort study. Figure shows mean values and 95% confidence limits for men (A) and women (B); FVC denotes forced vital capacity; Values obtained from regression models and adjusted for gestational age at birth, maternal smoking during pregnancy, and adult height, weight, cigarette smoking (never, former and current), and physical activity level (high versus low); P for interaction between birth weight and weight gain during the first year were 0.57 in men and 0.14 in women.

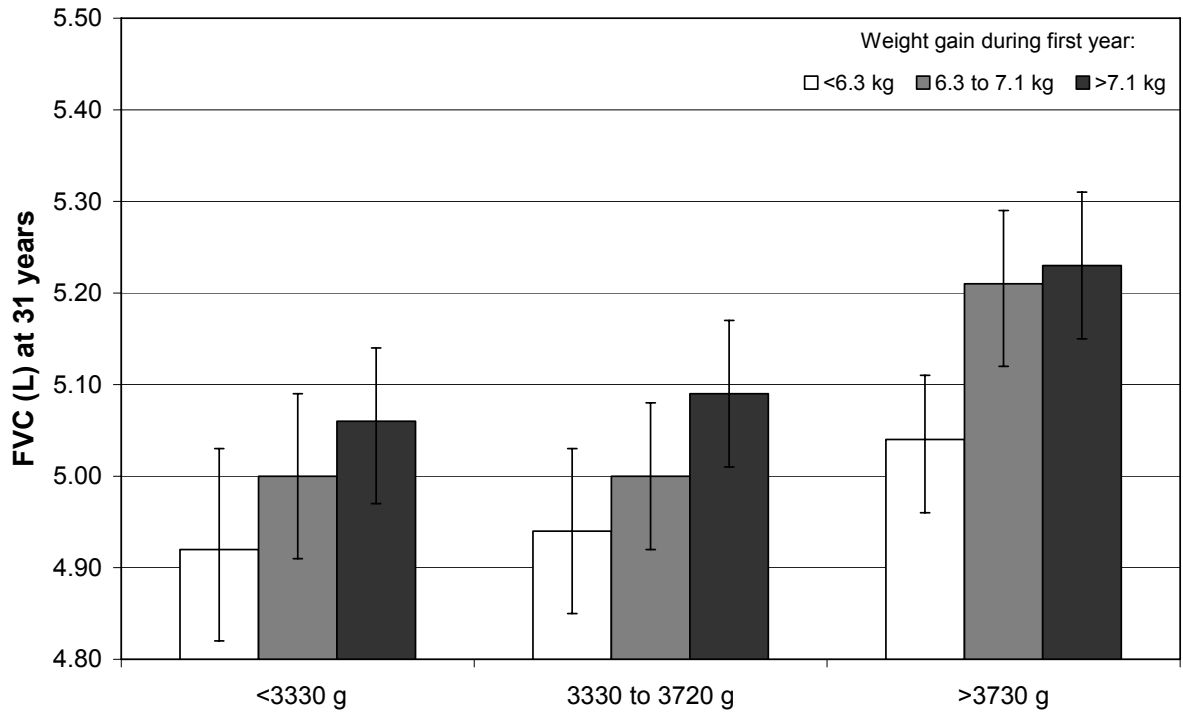

**A. Birth weight in men (N=2346)**

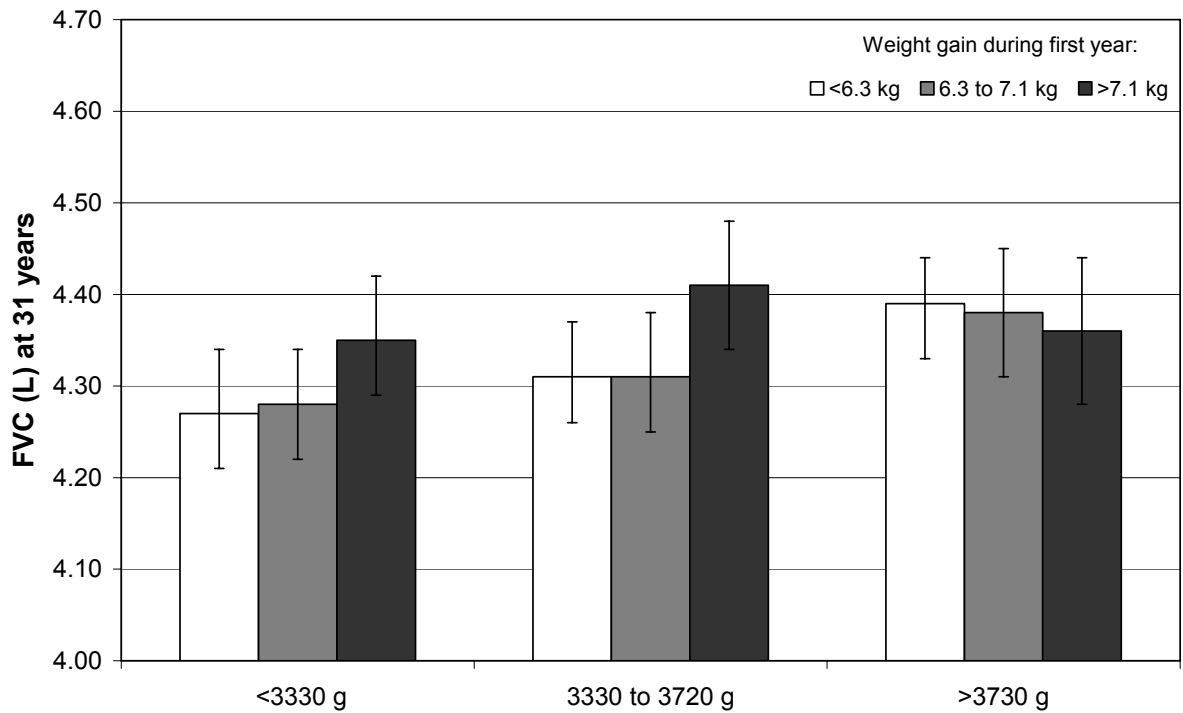

**B. Birth weight in women (N=2385)**

Figure S2. Forced vital capacity (L) at age 31 years by tertiles of birth weight stratified by adult characteristics of men and women in the 1966 Northern Finland Birth Cohort study. Figure shows mean values and 95% confidence limits for men (A) and women (B); FVC denotes forced vital capacity; Values obtained from regression models and adjusted for gestational age at birth, maternal smoking during pregnancy, and adult height, weight, cigarette smoking (never, former and current), and physical activity level (high versus low) except for factor under consideration or weight for analysis using body-mass index ( $\text{weight}/\text{height}^2$ ); Smokers were current smokers, and non-smokers were never and former smokers combined; High physical activity level defined as participation in brisk activity of at least 20 minutes twice a week and low level if participation is less in duration and/or frequency per week; P for interactions: birth weight and smoking (men=0.11, women=0.70), birth weight and physical activity (men=0.29, women=0.47), and birth weight and body-mass index (men=0.69, women=0.62).



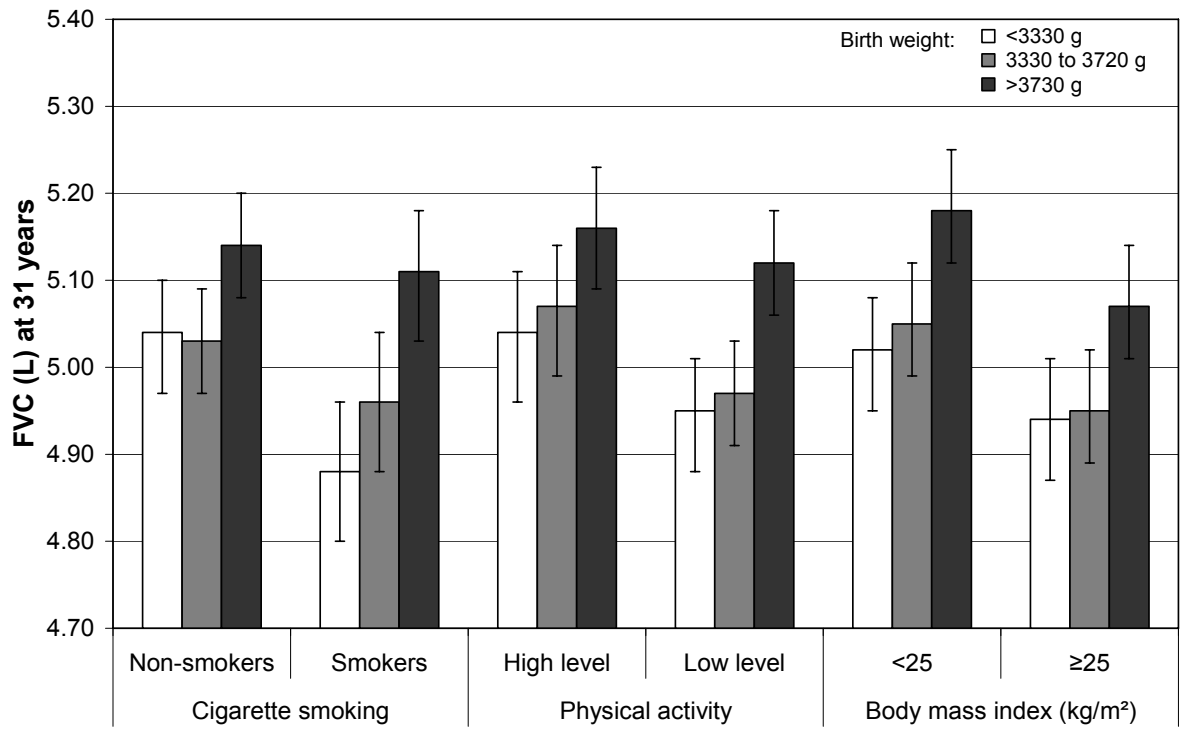

**A. Characteristics of men at 31 years (N=2684)**

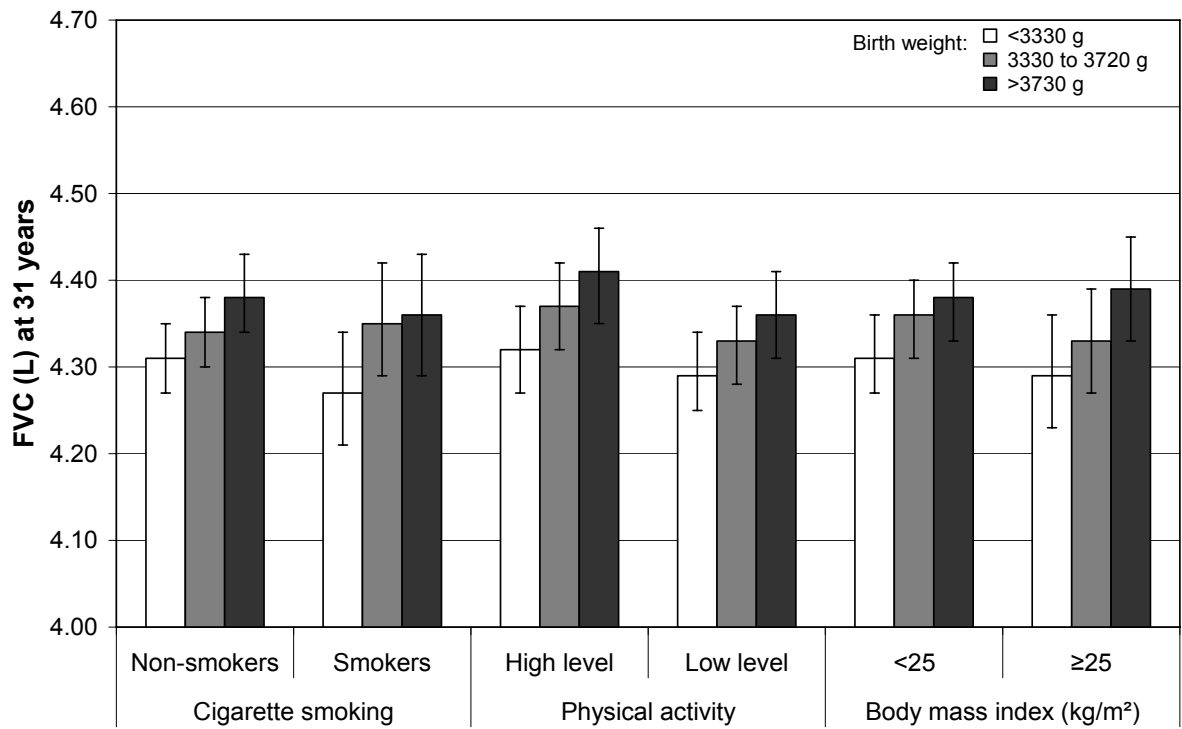

**B. Characteristics of women at 31 years (N=2706)**
