# Supplementary material
Source: PubMed Central journal article supplement (PMC2117170)

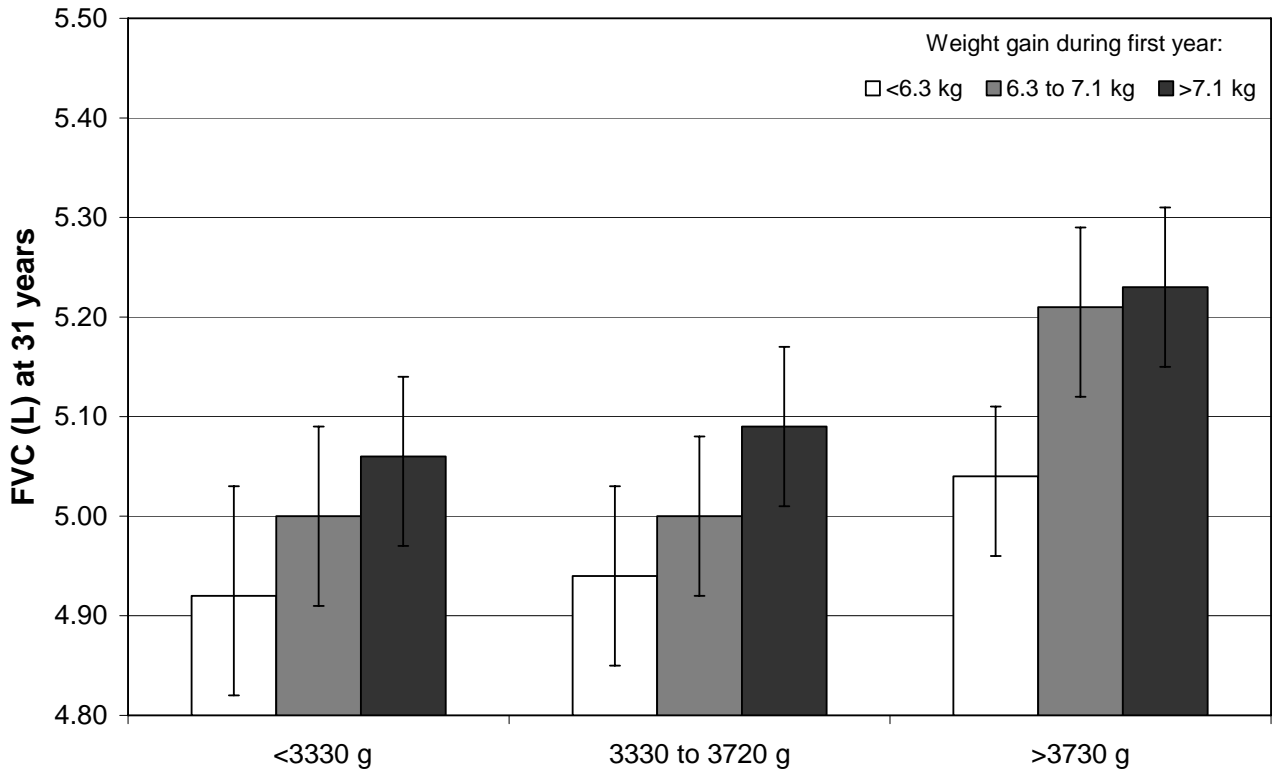

**A. Birth weight in men (N=2262)**

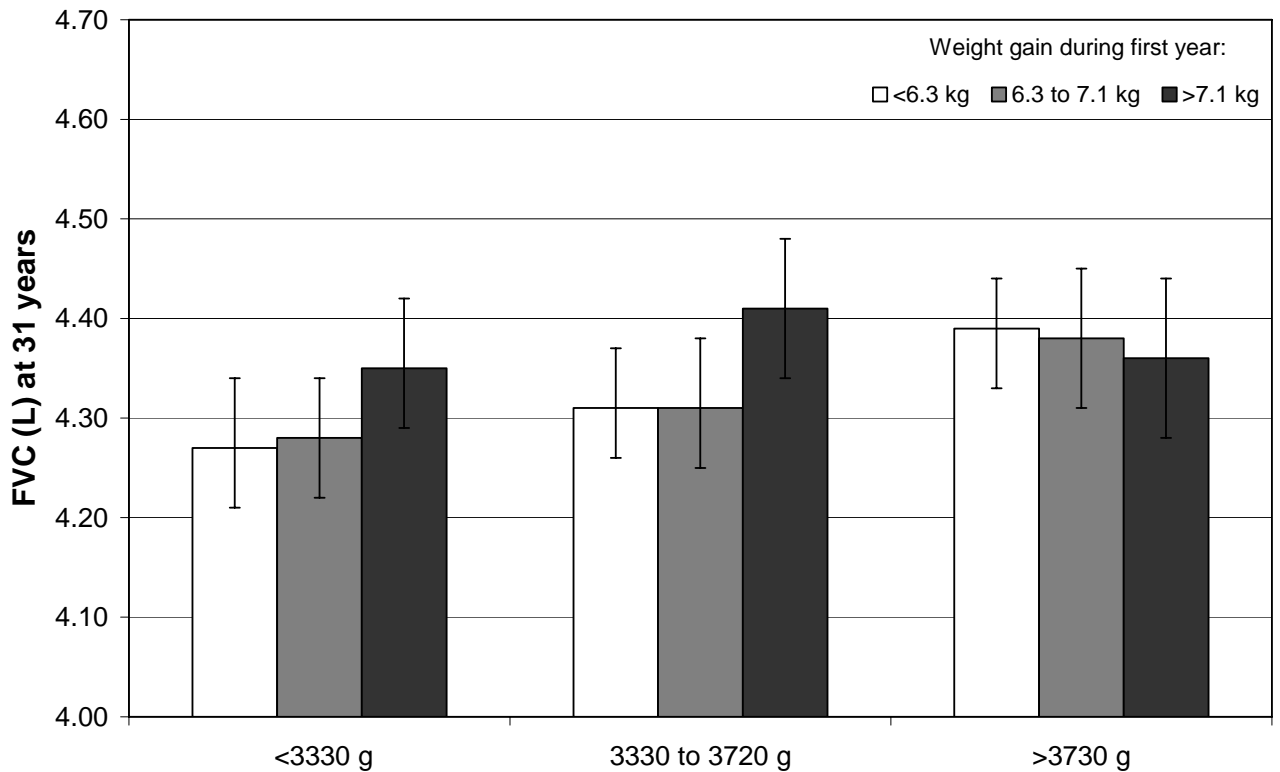

**B. Birth weight in women (N=2295)**

Supplement: thorax_thx.2006.066241_2.pdf [file thorax_thx.2006.066241_2.pdf]
